# Supplementary material for: Dynamic networks observed in the nucleosome core particles couple the histone globular domains with DNA
Source: PubMed Central journal article supplement (PMC7599221; doi:10.1038/s42003-020-01369-3), 2020-10-30
Supplement: 42003_2020_1369_MOESM1_ESM.pdf [file 42003_2020_1369_MOESM1_ESM.pdf]

## **Dynamic Networks Observed in the Nucleosome Core Particles Couple the Histone Globular Domains with DNA**

Xiangyan Shi<sup>1\*+</sup>, Chinmayi Prasanna<sup>2+</sup>, Aghil Soman<sup>2</sup>, Konstantin Pervushin<sup>2</sup> and Lars Nordenskiöld<sup>2\*</sup>

1. School of Physical and Mathematical Sciences, Nanyang Technological University, 21 Nanyang Link, Singapore 637371

2. School of Biological Sciences, Nanyang Technological University, 60 Nanyang Drive, Singapore 637551

+ Those authors contributed equally

\*For correspondence: shi.xiangyan@ntu.edu.sg (XS); larsnor@ntu.edu.sg (LN)

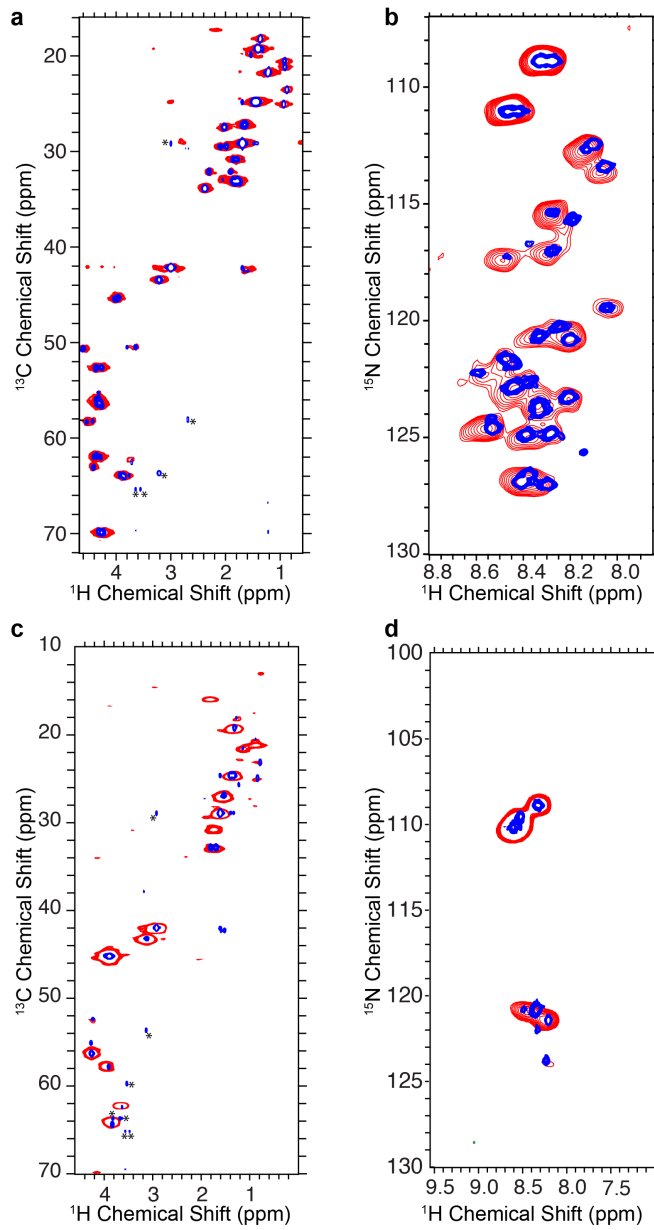

**Supplementary Fig. 1** **a** Overlaid SSNMR  $^1\text{H}$ - $^{13}\text{C}$  correlation spectrum of the precipitated Widom 601 NCP (red) and liquid-state HSQC NMR spectrum of the solubilized NCP (blue) contained uniformly  $^{13}\text{C}$ ,  $^{15}\text{N}$  labelled hH3. **b** Overlaid SSNMR  $^1\text{H}$ - $^{15}\text{N}$  correlation spectrum of the precipitated Widom 601 NCP (red) and liquid-state HSQC NMR spectrum of the solubilized NCP (blue) contained uniformly  $^{13}\text{C}$ ,  $^{15}\text{N}$  labelled hH3. **c** Overlaid SSNMR  $^1\text{H}$ - $^{13}\text{C}$  correlation spectrum of the precipitated Widom 601 NCP (red) and liquid-state HSQC NMR spectrum of the solubilized NCP (blue) contained uniformly  $^{13}\text{C}$ ,  $^{15}\text{N}$  labelled hH4. **d** Overlaid SSNMR  $^1\text{H}$ - $^{15}\text{N}$  correlation spectrum of the precipitated Widom 601 NCP (red) and liquid-state HSQC NMR spectrum of the solubilized NCP (blue) contained uniformly  $^{13}\text{C}$ ,  $^{15}\text{N}$  labelled hH4. Asterisks mark the peaks do not belong to the NCPs.

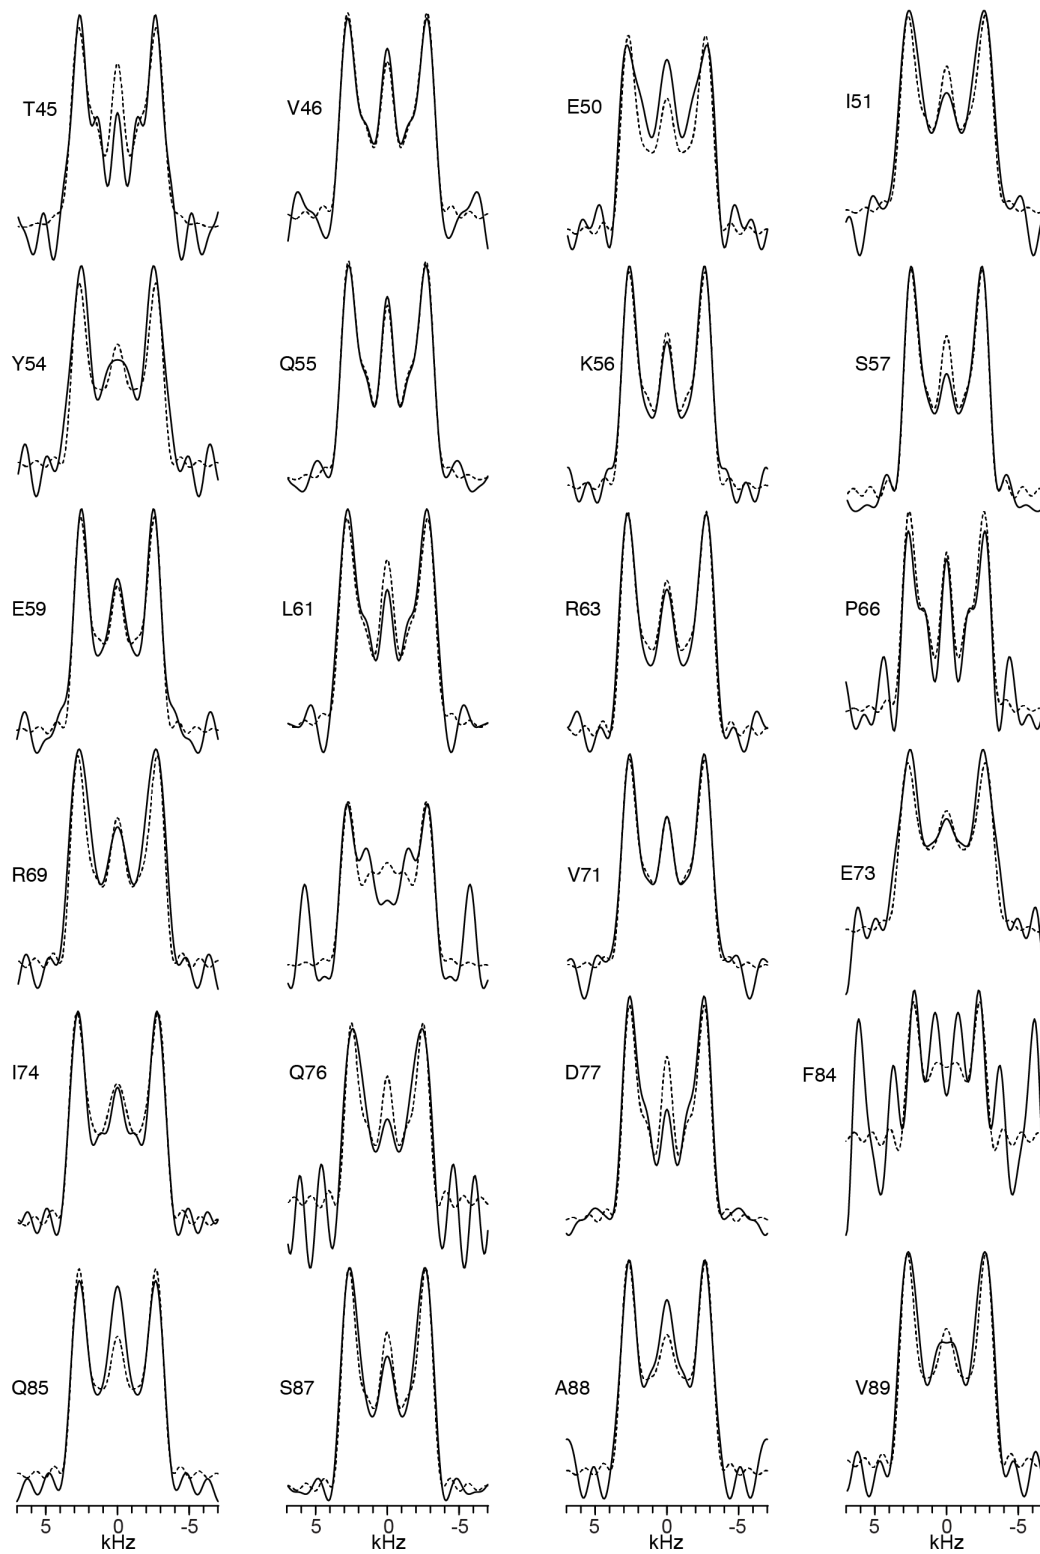

**Supplementary Fig. 2** Site-resolved experimental (solid) and simulated (dotted)  $^1\text{H}$ - $^{13}\text{C}\alpha$  dipolar line shapes for hH3 in the Widom 601 NCP. The experimental line shapes are extracted from a 3D DIPSHIFT with R12;<sup>4</sup> symmetry dipolar recoupling pulses. The SIMPSON output values of the root-mean-square (rms) deviation between experimental and simulated line shapes are provided.

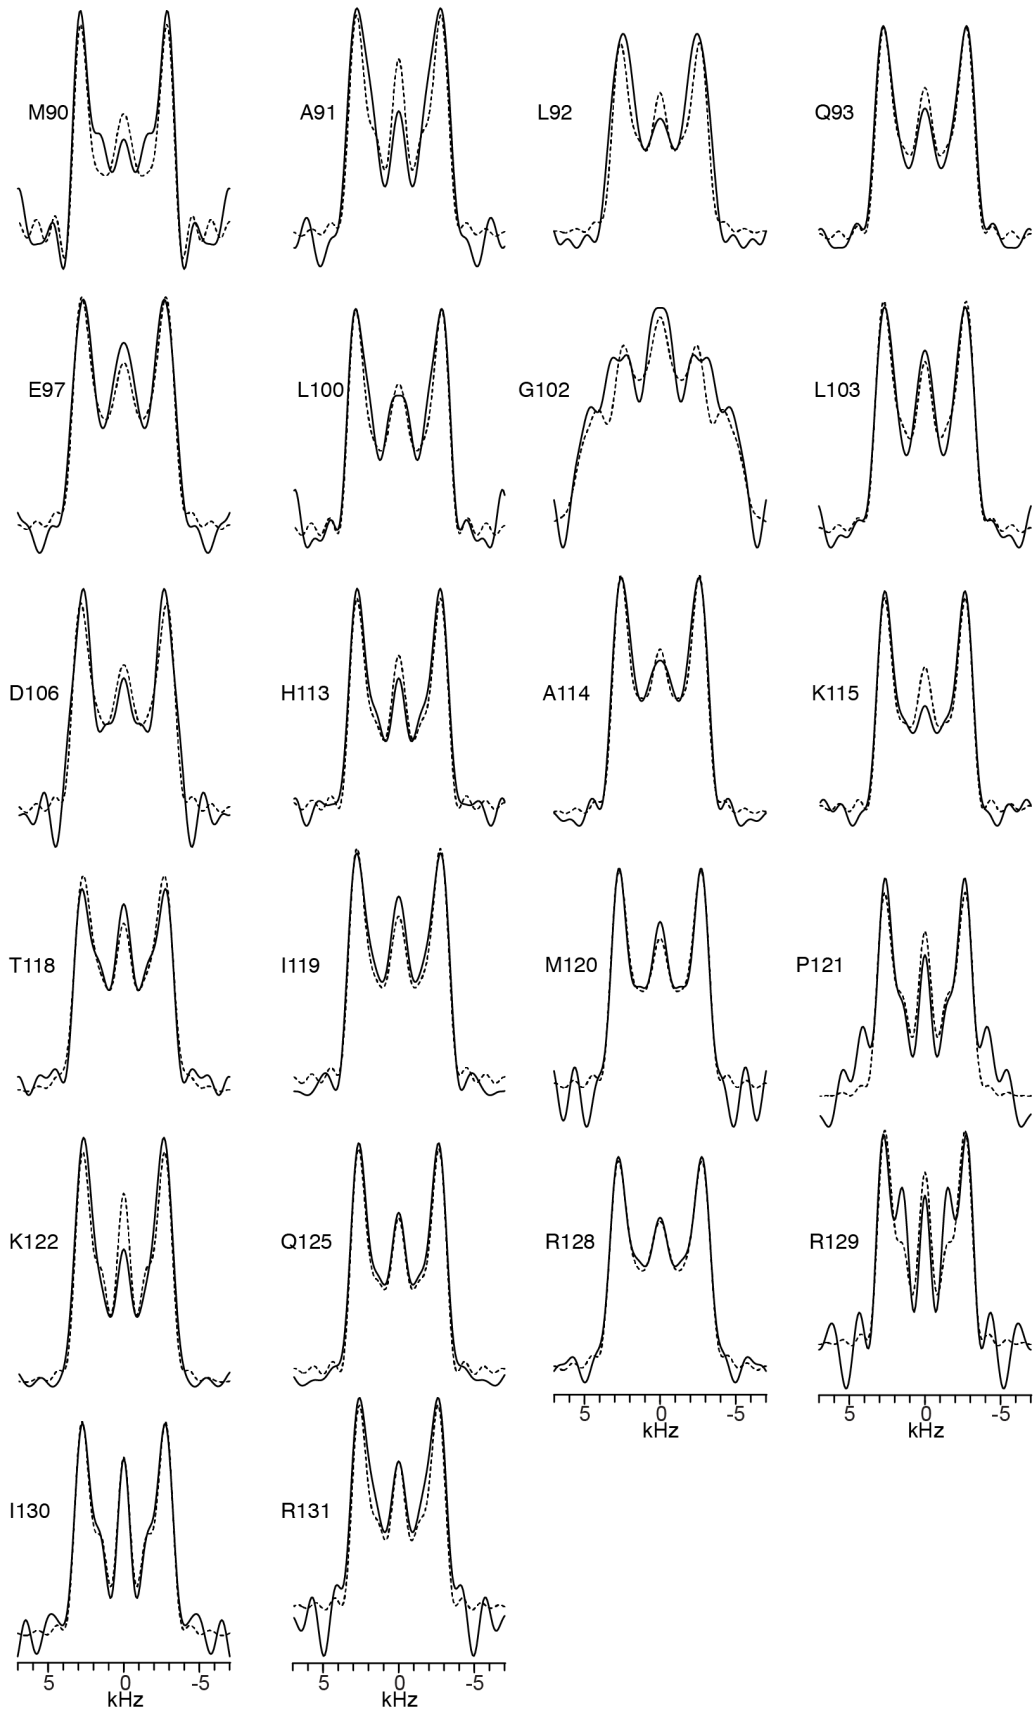

**Supplementary Fig. 2 (Continued)**

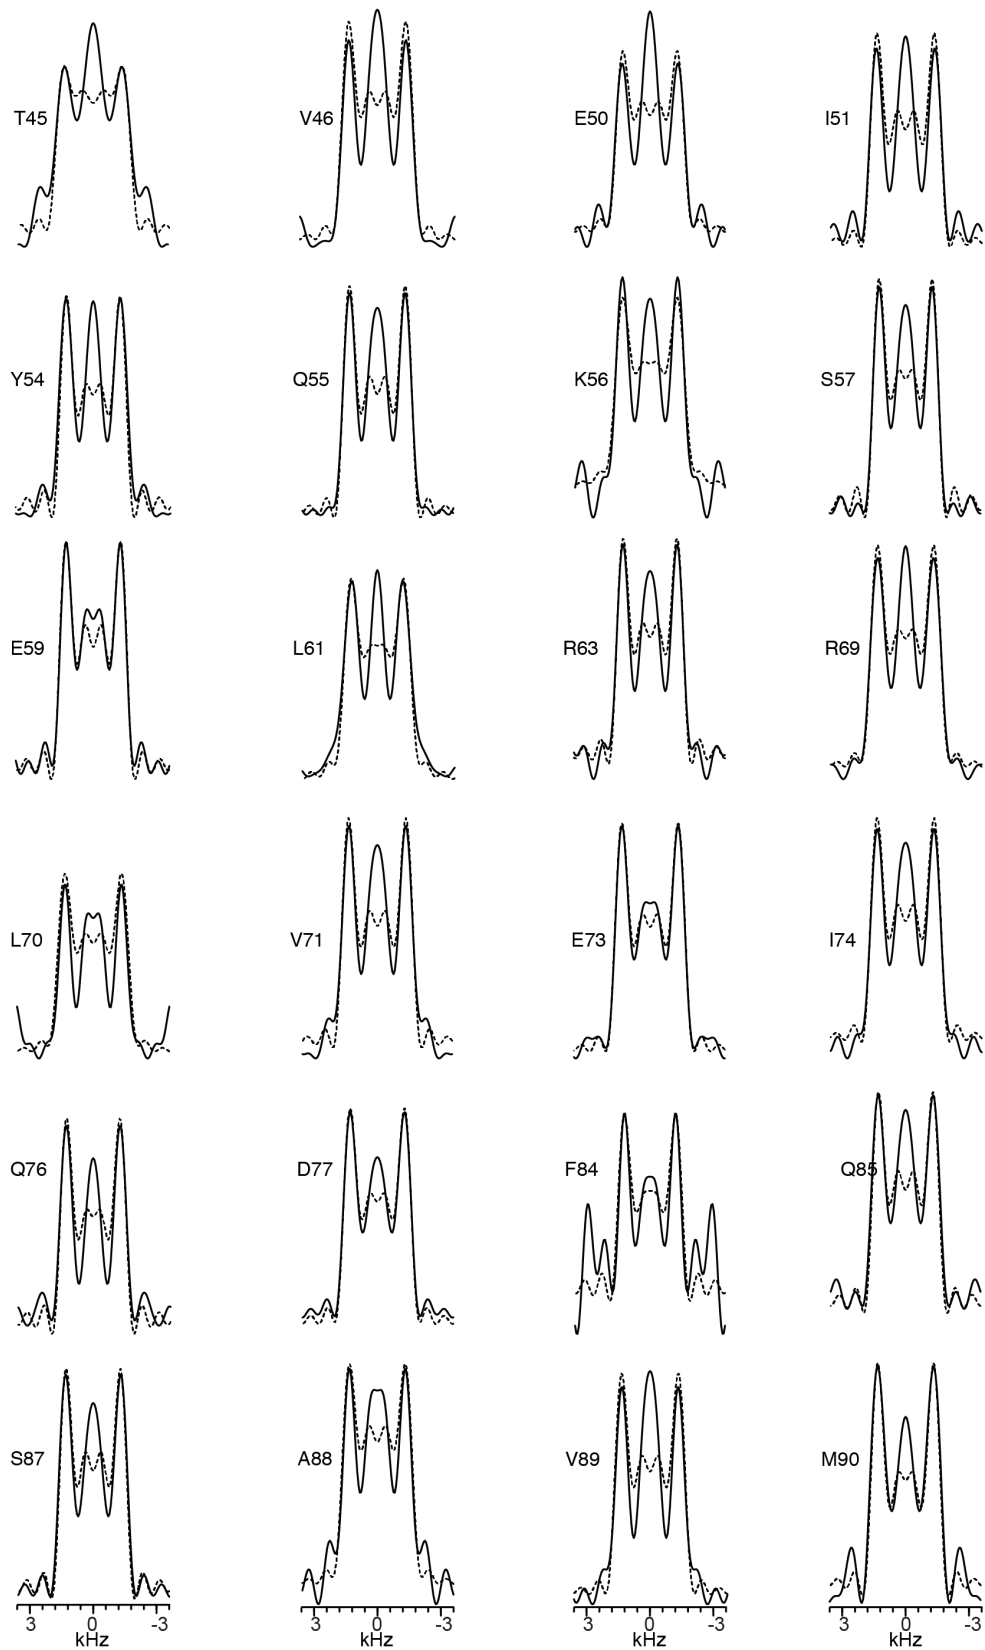

**Supplementary Fig. 3** Site-resolved experimental (solid) and simulated (dotted)  $^1\text{H}$ - $^{15}\text{N}$  dipolar line shapes for hH3 in the Widom 601 NCP. The experimental line shapes are extracted from a 3D DIPSHIFT with  $\text{R}12_1^4$  symmetry dipolar recoupling pulses. The SIMPSON output values of the root-mean-square (rms) deviation between experimental and simulated line shapes are provided.

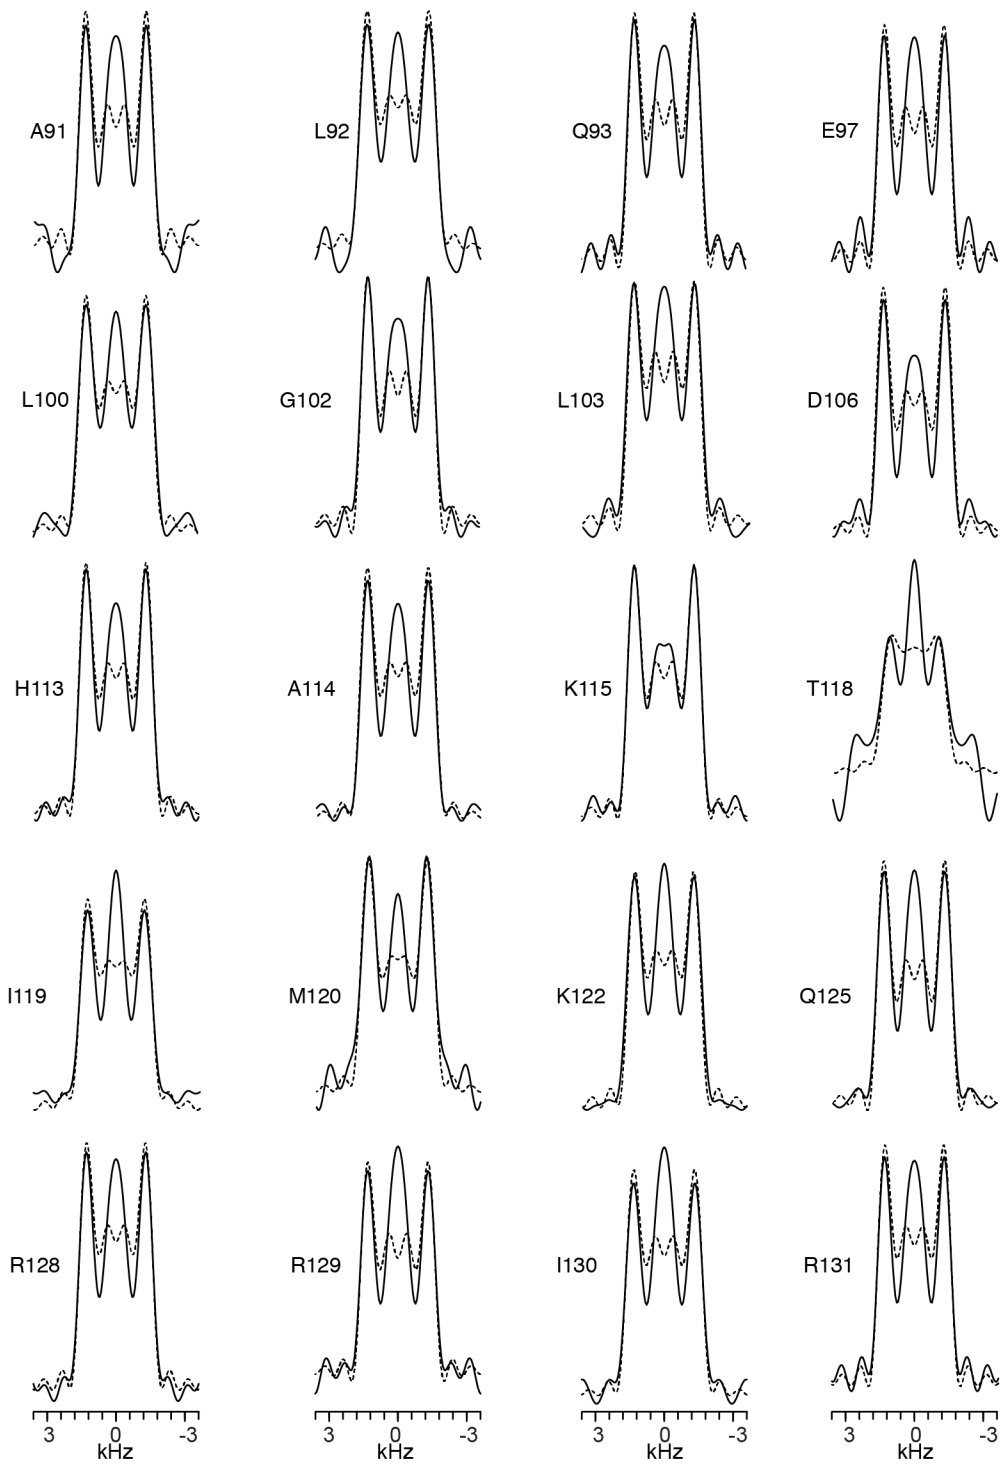

**Supplementary Fig. 3 (Continued)**

**Supplementary Table 1** SSNMR parameters of experiments performed for the Widom 601 and telomeric NCPs.

| Field (T)                                        | 18.8                                                             |           |           |                 |                                                                  |           |           |
|--------------------------------------------------|------------------------------------------------------------------|-----------|-----------|-----------------|------------------------------------------------------------------|-----------|-----------|
| Sample weight                                    | Widom 601 NCP ( <sup>13</sup> C, <sup>15</sup> N hH3)<br>55.2 mg |           |           |                 | Telomeric NCP ( <sup>13</sup> C, <sup>15</sup> N hH3)<br>11.7 mg |           |           |
| hydration level                                  | 65% (by wt)                                                      |           |           |                 | 66% (by wt)                                                      |           |           |
| Experiment                                       | CC                                                               | NCA       | NCO       | CANCO           | CC                                                               | NCA       | NCO       |
| MAS rate (kHz)                                   | 15.151                                                           | 15.151    | 15.151    | 15.151          | 15.151                                                           | 15.151    | 15.151    |
| Probe                                            | 3.2 mm HCN EFree MAS probe                                       |           |           |                 | 1.9 mm HCN MAS probe                                             |           |           |
| transfer 1                                       | HC CP                                                            | HN CP     | HN CP     | HC CP           | HC CP                                                            | HN CP     | HN CP     |
| rf field (kHz), <sup>1</sup> H                   | 70.4                                                             | 52.2      | 52.2      | 70.0            | 67.4                                                             | 64.9      | 64.9      |
| shape                                            | ramp                                                             | ramp      | ramp      | ramp            | ramp                                                             | ramp      | ramp      |
| rf field (kHz), <sup>15</sup> N/ <sup>13</sup> C | 53.0                                                             | 37.9      | 37.9      | 53.0            | 53.0                                                             | 53.0      | 53.0      |
| transfer time                                    | 1.0                                                              | 1.0       | 1.0       | 0.8             | 1.0                                                              | 1.2       | 1.2       |
| carrier (ppm)                                    | 103.0                                                            | –         | –         | 55.0            | –                                                                | –         | –         |
| <sup>13</sup> C, <sup>15</sup> N                 | –                                                                | 115.4     | 115.4     | –               | 102.7                                                            | 120.1     | 120.1     |
| transfer 2                                       | DARR                                                             | NCA       | NCO       | CAN             | DARR                                                             | NCA       | NCO       |
| rf field (kHz), <sup>13</sup> C                  | –                                                                | SPECIFIC  | SPECIFIC  | SPECIFIC        | –                                                                | SPECIFIC  | SPECIFIC  |
| shape                                            | –                                                                | tangent   | tangent   | tangent         | –                                                                | tangent   | tangent   |
| rf field (kHz), <sup>15</sup> N                  | –                                                                | 37.9      | 22.7      | 37.9            | –                                                                | 37.9      | 22.7      |
| rf field (kHz), <sup>1</sup> H cw                | 14.1                                                             | 89.4      | 89.4      | 89.4            | 15.1                                                             | 93.6      | 91.8      |
| transfer time                                    | 20                                                               | 4.0       | 4.0       | 3.0             | 20                                                               | 3.0       | 3.5       |
| carrier (ppm)                                    | 103.0                                                            | 58.0      | 178.0     | 55.0            | 102.7                                                            | 54.7      | 177.8     |
| <sup>13</sup> C, <sup>15</sup> N                 | –                                                                | 115.4     | 115.4     | 115.4           | –                                                                | 120.1     | 120.1     |
| transfer 3                                       | –                                                                | –         | –         | NCO<br>SPECIFIC | –                                                                | –         | –         |
| rf field (kHz), <sup>13</sup> C                  | –                                                                | –         | –         | 45.0            | –                                                                | –         | –         |
| shape                                            | –                                                                | –         | –         | –               | –                                                                | –         | –         |
| rf field (kHz), <sup>15</sup> N                  | –                                                                | –         | –         | 22.7            | –                                                                | –         | –         |
| rf field (kHz), <sup>1</sup> H cw                | –                                                                | –         | –         | 89.4            | –                                                                | –         | –         |
| transfer time                                    | –                                                                | –         | –         | 3.0             | –                                                                | –         | –         |
| carrier (ppm)                                    | –                                                                | –         | –         | 178.0           | –                                                                | –         | –         |
| <sup>13</sup> C, <sup>15</sup> N                 | –                                                                | –         | –         | 115.4           | –                                                                | –         | –         |
| digitalization, F1                               | C                                                                | N         | N         | CA              | C                                                                | N         | N         |
| t1 increments                                    | 768                                                              | 192       | 192       | 84              | 768                                                              | 76        | 76        |
| sweep width (kHz)                                | 45453                                                            | 7575.5    | 7575.5    | 7575.5          | 45453                                                            | 3030.2    | 3030.2    |
| acquisition time (ms)                            | 8.4                                                              | 12.7      | 12.7      | 5.5             | 8.4                                                              | 12.5      | 12.5      |
| digitalization, F2                               | C                                                                | C         | C         | N               | C                                                                | C         | C         |
| t2 increments                                    | 1536                                                             | 832       | 832       | 48              | 1536                                                             | 448       | 448       |
| sweep width (kHz)                                | 53571.43                                                         | 29761.904 | 29761.904 | 3030.2          | 53571.43                                                         | 15151.516 | 15151.516 |
| acquisition time (ms)                            | 14.4                                                             | 14.0      | 14.0      | 7.9             | 14.4                                                             | 14.8      | 14.8      |
| digitalization, F3                               | –                                                                | –         | –         | CO              | –                                                                | –         | –         |
| t3 increments                                    | –                                                                | –         | –         | 1088            | –                                                                | –         | –         |
| sweep width (kHz)                                | –                                                                | –         | –         | 45454.547       | –                                                                | –         | –         |
| acquisition time (ms)                            | –                                                                | –         | –         | 11.9            | –                                                                | –         | –         |
| H decoupling<br>rf field (kHz)                   | 73.5                                                             | 73.5      | 73.5      | 73.5            | 81.4                                                             | 81.4      | 81.4      |
| shape                                            | SPINAL 64                                                        | SPINAL 64 | SPINAL 64 | SPINAL 64       | SPINAL 64                                                        | SPINAL 64 | SPINAL 64 |
| number of scans                                  | 96                                                               | 192       | 196       | 56              | 512                                                              | 4224      | 5832      |
| pulse delay (s)                                  | 1.5                                                              | 1.5       | 1.5       | 1.5             | 1.5                                                              | 1.5       | 1.5       |

Supplementary Table 1 (Continued)

| Field (T)                                            | 18.8                                                           |                   |                   |                                                                  |                   |                   |
|------------------------------------------------------|----------------------------------------------------------------|-------------------|-------------------|------------------------------------------------------------------|-------------------|-------------------|
| Sample weight                                        | Widom 601 NCP ( <sup>13</sup> C, <sup>15</sup> N hH4)<br>46 mg |                   |                   | Telomeric NCP ( <sup>13</sup> C, <sup>15</sup> N hH4)<br>13.7 mg |                   |                   |
| hydration level                                      | 57% (by wt)                                                    |                   |                   | 63% (by wt)                                                      |                   |                   |
| Experiment                                           | CC                                                             | NCA               | NCO               | CC                                                               | NCA               | NCO               |
| MAS rate (kHz)                                       | 15.151                                                         | 15.151            | 15.151            | 17.857                                                           | 17.857            | 17.857            |
| Probe                                                | 3.2 mm HCN EFree MAS probe                                     |                   |                   | 1.9 mm HCN MAS probe                                             |                   |                   |
| transfer 1                                           | HC CP                                                          | HN CP             | HN CP             | HC CP                                                            | HN CP             | HN CP             |
| rf field (kHz), <sup>1</sup> H                       | 82.2                                                           | 63.7              | 63.7              | 81.5                                                             | 76.9              | 76.9              |
| shape                                                | ramp                                                           | ramp              | ramp              | ramp                                                             | ramp              | ramp              |
| rf field (kHz), <sup>15</sup> N/ <sup>13</sup> C     | 56.9                                                           | 44.6              | 44.6              | 62.5                                                             | 44.6              | 44.6              |
| transfer time                                        | 1.4                                                            | 1.4               | 1.4               | 1.2                                                              | 1.0               | 1.0               |
| carrier (ppm)<br><sup>13</sup> C, <sup>15</sup> N    | 103.5                                                          | –                 | –                 | –                                                                | –                 | –                 |
|                                                      | –                                                              | 115.8             | 115.8             | 102.6                                                            | 115.0             | 115.0             |
| transfer 2                                           | DARR                                                           | NCA<br>SPECIFIC   | NCO<br>SPECIFIC   | DARR                                                             | NCA<br>SPECIFIC   | NCO<br>SPECIFIC   |
| rf field (kHz), <sup>13</sup> C                      | –                                                              | 30.8,             | 48.8,             | –                                                                | 31.7              | 51.8              |
| shape                                                | –                                                              | tangent           | tangent           | –                                                                | tangent           | tangent           |
| rf field (kHz), <sup>15</sup> N                      | –                                                              | 44.6              | 26.8              | –                                                                | 44.6              | 26.8              |
| rf field (kHz), <sup>1</sup> H cw                    | 15.5                                                           | 88.6              | 90.6              | 16.1                                                             | 93.6              | 91.8              |
| transfer time                                        | 20                                                             | 3.5               | 4.5               | 20                                                               | 3.5               | 4.0               |
| carrier (ppm)<br><sup>13</sup> C, <sup>15</sup> N    | 103.5                                                          | 55.5              | 178.5             | 102.6                                                            | 54.6              | 177.6             |
|                                                      | –                                                              | 115.8             | 115.8             | –                                                                | 115.0             | 118               |
| transfer 3                                           | –                                                              | –                 | –                 | –                                                                | –                 | –                 |
| rf field (kHz), <sup>13</sup> C                      | –                                                              | –                 | –                 | –                                                                | –                 | –                 |
| shape                                                | –                                                              | –                 | –                 | –                                                                | –                 | –                 |
| rf field (kHz), <sup>15</sup> N                      | –                                                              | –                 | –                 | –                                                                | –                 | –                 |
| rf field (kHz), <sup>1</sup> H cw                    | –                                                              | –                 | –                 | –                                                                | –                 | –                 |
| transfer time                                        | –                                                              | –                 | –                 | –                                                                | –                 | –                 |
| carrier (ppm)<br><sup>13</sup> C, <sup>15</sup> N    | –                                                              | –                 | –                 | –                                                                | –                 | –                 |
|                                                      | –                                                              | –                 | –                 | –                                                                | –                 | –                 |
| digitalization, F1                                   | C                                                              | N                 | N                 | C                                                                | N                 | N                 |
| t1 increments                                        | 896                                                            | 112               | 112               | 896                                                              | 88                | 72                |
| sweep width (kHz)                                    | 53571                                                          | 4464.25           | 4464.25           | 53571                                                            | 3571.4            | 2976.167          |
| acquisition time (ms)                                | 8.4                                                            | 12.5              | 12.5              | 8.4                                                              | 12.3              | 12.1              |
| digitalization, F2                                   | C                                                              | C                 | C                 | C                                                                | C                 | C                 |
| t2 increments                                        | 1664                                                           | 512               | 512               | 1664                                                             | 1536              | 512               |
| sweep width (kHz)                                    | 53571.43                                                       | 17857.143         | 17857.143         | 53571.43                                                         | 53571.43          | 17857.143         |
| acquisition time (ms)                                | 15.5                                                           | 14.3              | 14.3              | 15.5                                                             | 14.3              | 14.3              |
| digitalization, F3                                   | –                                                              | –                 | –                 | –                                                                | –                 | –                 |
| t3 increments                                        | –                                                              | –                 | –                 | –                                                                | –                 | –                 |
| sweep width (kHz)                                    | –                                                              | –                 | –                 | –                                                                | –                 | –                 |
| acquisition time (ms)                                | –                                                              | –                 | –                 | –                                                                | –                 | –                 |
| <sup>1</sup> H decoupling<br>rf field (kHz)<br>shape | 80.6<br>SPINAL 64                                              | 80.6<br>SPINAL 64 | 80.6<br>SPINAL 64 | 78.5<br>SPINAL 64                                                | 78.5<br>SPINAL 64 | 78.5<br>SPINAL 64 |
| number of scans                                      | 48                                                             | 196               | 196               | 168                                                              | 1728              | 1408              |
| pulse delay (s)                                      | 1.5                                                            | 1.5               | 1.5               | 1.5                                                              | 1.5               | 1.5               |
